# Supplementary material for: Nitrogen Mineralization in Texturally Contrasting Soils Subjected to Different Organic Amendments under Semi-Arid Climates
Source: MDPI journal article supplement (doi:10.3390/land12050989), 2023-04-29
Supplement: s1 [file s1]

Table S1. Two-way ANOVA analysis with soil type and soil amendments and their interaction on net mineralization ( $N_{\min}$ ) and percentage organic N mineralization ( $\%N_{\text{org}}$ ) during the incubation periods.

| SOV    | D<br>F | 1d                 |                    | 5d                 |                    | 10d                |                    | 20d                |                    | 40d                        |                            | 60d                |                           | 150d               |                    |
|--------|--------|--------------------|--------------------|--------------------|--------------------|--------------------|--------------------|--------------------|--------------------|----------------------------|----------------------------|--------------------|---------------------------|--------------------|--------------------|
|        |        | F value            |                    | F value            |                    | F value            |                    | F value            |                    | F value                    |                            | F value            |                           | F value            |                    |
|        |        | $N_{\min}$         | $\%N_{\text{org}}$ | $N_{\min}$         | $\%N_{\text{org}}$ | $N_{\min}$         | $\%N_{\text{org}}$ | $N_{\min}$         | $\%N_{\text{org}}$ | $N_{\min}$                 | $\%N_{\text{org}}$         | $N_{\min}$         | $\%N_{\text{org}}$        | $N_{\min}$         | $\%N_{\text{org}}$ |
| ST     | 2      | 0.16 <sup>*</sup>  | 0.11 <sup>*</sup>  | 0.24 <sup>*</sup>  | 0.21 <sup>*</sup>  | 0.21 <sup>**</sup> | 0.15 <sup>**</sup> | 0.96 <sup>**</sup> | 0.46 <sup>**</sup> | <b>4.11</b> <sup>***</sup> | <b>3.76</b> <sup>***</sup> | 1.64 <sup>**</sup> | 1.45 <sup>**</sup>        | 0.11 <sup>**</sup> | 0.09 <sup>**</sup> |
| OAs    | 5      | 0.51 <sup>*</sup>  | 0.41 <sup>*</sup>  | 0.66 <sup>**</sup> | 0.55 <sup>**</sup> | 0.51 <sup>**</sup> | 0.38 <sup>**</sup> | 0.42 <sup>**</sup> | 0.36 <sup>**</sup> | <b>4.35</b> <sup>***</sup> | <b>3.41</b> <sup>***</sup> | 3.21 <sup>**</sup> | <b>3.71</b> <sup>**</sup> | 1.32 <sup>**</sup> | 1.02 <sup>**</sup> |
| ST×OAs | 10     | 0.45 <sup>ns</sup> | 0.61 <sup>ns</sup> | 0.93 <sup>ns</sup> | 1.11 <sup>ns</sup> | 0.67 <sup>ns</sup> | 0.51 <sup>ns</sup> | 1.23 <sup>ns</sup> | 0.84 <sup>ns</sup> | 0.48 <sup>ns</sup>         | 0.86 <sup>ns</sup>         | 0.64 <sup>ns</sup> | 1.11 <sup>ns</sup>        | 1.02 <sup>ns</sup> | 1.36 <sup>ns</sup> |

Abbreviations are SOV: Source of variance; ST: Soil textures; OAs: Organic amendments; DF: Degree of freedom;  $N_{\min}$ : Nitrogen mineralization;  $N_{\text{org}}$ : Organic nitrogen. Significance code:  $\leq 0.001$ \*\*\*; 0.01\*\*; 0.05\*; "ns", non-significant
